# Supplementary material for: Clinical and Radiologic Characteristics, Surgical Outcomes, and Its Possible Origins of Chondroma of the Dural Convexity
Source: Biomed Res Int. 2020 Dec 17;2020:5961358. doi: 10.1155/2020/5961358 (PMC7759409; doi:10.1155/2020/5961358)
Supplement: Supplementary Materials — Figure S1: radiographic images and hematoxylin-eosin staining of Case 2. (a–d) Pre- and (e–g) postoperative radiographic images indicate a mass located in the right frontal region with cystic degeneration. (a) Coronal T1-weighted images (after gadolinium enhancement) demonstrate slight uneven enhancement. (b) Sagittal T1-weighted images demonstrate heterogeneous signals. (c) Axial T2 demonstrates uneven hyperintense and cystic degeneration in the lesion with no significant edema or mass effect in adjacent structures. (d) CT scan shows that the lesion was hypodense with calcification. (e–g) Postoperative CT scan shows that the tumor was completely removed (MRI was not available). (h) Hematoxylin-eosin staining of Case 2. Figure S2: radiographic images and hematoxylin-eosin staining of Case 3. (a–c) Pre- and (e–g) postoperative radiographic images indicate a mass located in the left frontal area with cystic degeneration. (a) Coronal T1-weighted images (after gadolinium enhancement) demonstrate marginal line-like enhancement. (b) Sagittal T1-weighted images demonstrate an isointense signal. (c) Axial T2 demonstrates mixed intense and cystic degeneration in the lesion with no significant edema or mass effect in adjacent structures. (d) Hematoxylin-eosin staining of Case 3. (e–g) Postoperative images show that the tumor was completely removed. Figure S3: radiographic images and hematoxylin-eosin staining of Case 4. (a–d) Pre- and (e–g) postoperative radiographic images indicate a mass located in the left frontal area with no cystic degeneration. (a) Coronal T1-weighted images (after gadolinium enhancement) demonstrate slight uneven enhancement. (b) Sagittal T1-weighted images demonstrate a mixed signal. (c) Axial T2 demonstrates mixed intensity with no significant edema or mass effect in adjacent structures. (d) CT scan shows that the lesion was hyperdense with calcification. (e–g) Postoperative images show that the tumor was completely removed. (h) Hematoxylin-eosin sta [file 5961358.f1.zip]

Archive with 4 entries (4 files):
- Fig. S1.ai
- Fig. S2.ai
- Fig. S3.ai
- Fig. S4.ai
